# Supplementary material for: A cobalt complex with 2,4,6-tris(di-2-pyridylamine)-1,3,5-triazine: antiferromagnetic couple governed single-molecule-magnet behaviour
Source: Royal Society of Chemistry journal article supplement (doi:10.1039/d0ra10828f), 2021-01-01
Supplement: d0ra10828f1.pdf [file d0ra10828f1.pdf]

## Supporting Information

# An Cobalt Complex with 2,4,6-Tris(di-2-pyridyl;amine)-1,3,5-triazine: Antiferromagnetic Couple Governed Single-molecule-magnet Behaviour

Hang Gao, <sup>\*a</sup> Ka Liu, <sup>b</sup> Jin Chang, <sup>a</sup> Juan Zhang <sup>a</sup>

<sup>a</sup> College of Biomedical Engineering, Taiyuan University of Technology, Taiyuan, 030024, China.

<sup>b</sup> Jingbo Biological Pharmaceutical Co., Ltd, Taiyuan 030003, China.

<sup>\*</sup>Corresponding authors, E-mail: hanggao@tyut.edu.cn.

## Content

|                                                                                                                                        |   |
|----------------------------------------------------------------------------------------------------------------------------------------|---|
| <b>Table S1.</b> Crystallographic data and structural refinement parameters for complexes <b>1</b> . . . . .                           | 2 |
| <b>Table S2.</b> Bond lengths [Å] and angles [deg] for <b>1</b> . . . . .                                                              | 3 |
| <b>Table S3.</b> The fit parameters obtained from analyses of the ac susceptibilities of <b>1</b> under 0.8 kOe bias dc field. . . . . | 4 |
| <b>Figure S1.</b> The plots $\tau_0$ vs. $H$ for complex <b>1</b> . . . . .                                                            | 4 |

**Table S1.** Crystallographic data and structural refinement parameters for complexes **1**.

|                                                                    | <b>C<sub>02</sub></b>                                                                           |
|--------------------------------------------------------------------|-------------------------------------------------------------------------------------------------|
| Formula                                                            | C <sub>66</sub> H <sub>68</sub> Co <sub>2</sub> N <sub>24</sub> O <sub>26</sub> Cl <sub>4</sub> |
| f w                                                                | 1873.10                                                                                         |
| <i>T</i> / K                                                       | 193(2)                                                                                          |
| $\lambda$ / Å                                                      | 1.34139                                                                                         |
| Crystal system                                                     | Monoclinic                                                                                      |
| Space group                                                        | <i>P</i> 2 <sub>1</sub> / <i>n</i>                                                              |
| <i>a</i> / Å                                                       | 13.483(3)                                                                                       |
| <i>b</i> / Å                                                       | 14.312(3)                                                                                       |
| <i>c</i> / Å                                                       | 20.482(4)                                                                                       |
| $\alpha$ / °                                                       | 90                                                                                              |
| $\beta$ / °                                                        | 101.02                                                                                          |
| $\gamma$ / °                                                       | 90                                                                                              |
| <i>V</i> / Å <sup>3</sup>                                          | 3879.5(15)                                                                                      |
| <i>Z</i>                                                           | 2                                                                                               |
| <i>D</i> <sub>c</sub> / g cm <sup>-3</sup>                         | 1.604                                                                                           |
| $\mu$ / mm <sup>-1</sup>                                           | 3.680                                                                                           |
| <i>F</i> (000)                                                     | 1924                                                                                            |
| $\theta$ / °                                                       | 3.158 to 53.982                                                                                 |
| Reflns collected                                                   | 65724                                                                                           |
| Reflns unique                                                      | 7070                                                                                            |
| <i>R</i> <sub>int</sub>                                            | 0.0917                                                                                          |
| GOF on <i>F</i> <sup>2</sup>                                       | 1.049                                                                                           |
| <i>R</i> <sub>1</sub> [ <i>I</i> > 2σ( <i>I</i> )] <sup>[a]</sup>  | 0.0467                                                                                          |
| <i>wR</i> <sub>2</sub> [ <i>I</i> > 2σ( <i>I</i> )] <sup>[b]</sup> | 0.1106                                                                                          |
| <i>R</i> <sub>1</sub> (all data) <sup>[a]</sup>                    | 0.0654                                                                                          |
| <i>wR</i> <sub>2</sub> (all data) <sup>[b]</sup>                   | 0.1249                                                                                          |
| Largest diff. Peak, hole / (e Å <sup>-3</sup> )                    | 0.722 and -0.777                                                                                |

<sup>[a]</sup> $R_1 = \Sigma ||F_o| - |F_c|| / \Sigma |F_o|$ ; <sup>[b]</sup> $wR_2 = [\Sigma w(F_o^2 - F_c^2)^2 / \Sigma w(F_o^2)^2]^{1/2}$ .

**Table S2.** Bond lengths [Å] and angles [deg] for **1**.

|                   |            |                   |          |
|-------------------|------------|-------------------|----------|
| Co(1)-N(11)       | 2.120(3)   | N(7)-C(14)        | 1.435(4) |
| Co(1)-O(2)        | 2.122(2)   | N(4)-C(1)         | 1.381(4) |
| Co(1)-N(8)A       | 2.132(3)   | N(4)-C(9)         | 1.421(4) |
| Co(1)-N(12)       | 2.133(2)   | N(4)-C(4)         | 1.440(4) |
| Co(1)-N(9)A       | 2.148(3)   | N(6)-C(9)         | 1.331(4) |
| Co(1)-O(1)        | 2.155(2)   | N(6)-C(13)        | 1.347(4) |
| Cl(2)-O(8)        | 1.393(4)   | N(5)-C(4)         | 1.326(4) |
| Cl(2)-O(9)        | 1.401(4)   | N(5)-C(8)         | 1.346(4) |
| Cl(2)-O(7)        | 1.418(3)   | C(24)-C(25)       | 1.383(4) |
| Cl(2)-O(10)       | 1.425(3)   | C(29)-C(30)       | 1.381(4) |
| Cl(1)-O(3)        | 1.393(4)   | C(19)-C(20)       | 1.380(4) |
| Cl(1)-O(6)        | 1.408(3)   | C(4)-C(5)         | 1.377(4) |
| Cl(1)-O(4)        | 1.408(3)   | C(20)-C(21)       | 1.380(4) |
| Cl(1)-O(5)        | 1.413(4)   | C(14)-C(15)       | 1.382(4) |
| N(8)-C(14)        | 1.338(4)   | C(9)-C(10)        | 1.391(4) |
| N(8)-C(18)        | 1.347(4)   | C(33)-C(32)       | 1.375(5) |
| N(10)-C(3)        | 1.393(4)   | C(23)-C(22)       | 1.374(5) |
| N(10)-C(29)       | 1.432(4)   | C(25)-C(26)       | 1.383(5) |
| N(10)-C(24)       | 1.441(4)   | C(18)-C(17)       | 1.372(5) |
| N(11)-C(24)       | 1.336(4)   | C(30)-C(31)       | 1.379(5) |
| N(11)-C(28)       | 1.356(4)   | C(5)-C(6)         | 1.382(5) |
| N(2)-C(3)         | 1.331(4)   | C(16)-C(15)       | 1.390(5) |
| N(2)-C(2)         | 1.344(4)   | C(16)-C(17)       | 1.390(5) |
| N(9)-C(19)        | 1.340(4)   | C(22)-C(21)       | 1.381(5) |
| N(9)-C(23)        | 1.354(4)   | C(32)-C(31)       | 1.381(5) |
| N(12)-C(29)       | 1.343(4)   | C(28)-C(27)       | 1.371(5) |
| N(12)-C(33)       | 1.351(4)   | C(6)-C(7)         | 1.378(5) |
| N(1)-C(2)         | 1.324(4)   | C(13)-C(12)       | 1.367(5) |
| N(1)-C(1)         | 1.329(4)   | C(10)-C(11)       | 1.382(5) |
| N(3)-C(3)         | 1.332(4)   | C(11)-C(12)       | 1.383(5) |
| N(3)-C(1)         | 1.341(4)   | C(27)-C(26)       | 1.385(5) |
| N(7)-C(2)         | 1.383(4)   | C(7)-C(8)         | 1.371(5) |
| N(7)-C(19)        | 1.432(4)   |                   |          |
| N(11)-Co(1)-O(2)  | 90.00(9)   | C(4)-N(5)-C(8)    | 116.5(3) |
| N(11)-Co(1)-N(8)A | 178.29(10) | N(11)-C(24)-C(25) | 123.1(3) |
| O(2)-Co(1)-N(8)A  | 91.68(9)   | N(11)-C(24)-N(10) | 117.1(3) |
| N(11)-Co(1)-N(12) | 87.24(10)  | C(25)-C(24)-N(10) | 119.8(3) |
| O(2)-Co(1)-N(12)  | 87.31(9)   | N(12)-C(29)-C(30) | 122.5(3) |
| N(8)A-Co(1)-N(12) | 92.51(10)  | N(12)-C(29)-N(10) | 115.7(3) |
| N(11)-Co(1)-N(9)A | 91.75(10)  | C(30)-C(29)-N(10) | 121.7(3) |
| O(2)-Co(1)-N(9)A  | 171.72(9)  | N(9)-C(19)-C(20)  | 123.8(3) |
| N(8)A-Co(1)-N(9)A | 86.63(10)  | N(9)-C(19)-N(7)   | 115.2(3) |

|                   |            |                   |          |
|-------------------|------------|-------------------|----------|
| N(12)-Co(1)-N(9)A | 100.86(9)  | C(20)-C(19)-N(7)  | 121.0(3) |
| N(11)-Co(1)-O(1)  | 92.07(9)   | N(1)-C(1)-N(3)    | 126.1(3) |
| O(2)-Co(1)-O(1)   | 85.33(9)   | N(1)-C(1)-N(4)    | 118.5(3) |
| N(8)A-Co(1)-O(1)  | 88.39(9)   | N(3)-C(1)-N(4)    | 115.5(3) |
| N(12)-Co(1)-O(1)  | 172.61(9)  | N(5)-C(4)-C(5)    | 124.3(3) |
| N(9)A-Co(1)-O(1)  | 86.52(9)   | N(5)-C(4)-N(4)    | 115.0(3) |
| O(8)-Cl(2)-O(9)   | 108.6(3)   | C(5)-C(4)-N(4)    | 120.7(3) |
| O(8)-Cl(2)-O(7)   | 111.6(3)   | C(19)-C(20)-C(21) | 118.6(3) |
| O(9)-Cl(2)-O(7)   | 107.7(3)   | N(8)-C(14)-C(15)  | 123.3(3) |
| O(8)-Cl(2)-O(10)  | 110.1(2)   | N(8)-C(14)-N(7)   | 115.6(3) |
| O(9)-Cl(2)-O(10)  | 108.7(2)   | C(15)-C(14)-N(7)  | 121.0(3) |
| O(7)-Cl(2)-O(10)  | 109.9(2)   | N(2)-C(3)-N(3)    | 126.9(3) |
| O(3)-Cl(1)-O(6)   | 112.1(3)   | N(2)-C(3)-N(10)   | 118.3(3) |
| O(3)-Cl(1)-O(4)   | 110.6(3)   | N(3)-C(3)-N(10)   | 114.8(3) |
| O(6)-Cl(1)-O(4)   | 108.3(2)   | N(6)-C(9)-C(10)   | 122.9(3) |
| O(3)-Cl(1)-O(5)   | 105.3(3)   | N(6)-C(9)-N(4)    | 115.4(3) |
| O(6)-Cl(1)-O(5)   | 111.2(3)   | C(10)-C(9)-N(4)   | 121.7(3) |
| O(4)-Cl(1)-O(5)   | 109.3(3)   | N(1)-C(2)-N(2)    | 127.3(3) |
| C(14)-N(8)-C(18)  | 117.7(3)   | N(1)-C(2)-N(7)    | 115.5(3) |
| C(14)-N(8)-Co(1)A | 119.65(19) | N(2)-C(2)-N(7)    | 117.1(3) |
| C(18)-N(8)-Co(1)A | 122.6(2)   | N(12)-C(33)-C(32) | 123.4(3) |
| C(3)-N(10)-C(29)  | 121.9(2)   | N(9)-C(23)-C(22)  | 122.8(3) |
| C(3)-N(10)-C(24)  | 117.6(2)   | C(24)-C(25)-C(26) | 118.4(3) |
| C(29)-N(10)-C(24) | 118.8(2)   | N(8)-C(18)-C(17)  | 123.1(3) |
| C(24)-N(11)-C(28) | 117.5(3)   | C(31)-C(30)-C(29) | 118.9(3) |
| C(24)-N(11)-Co(1) | 122.3(2)   | C(4)-C(5)-C(6)    | 117.9(3) |
| C(28)-N(11)-Co(1) | 119.9(2)   | C(15)-C(16)-C(17) | 119.1(3) |
| C(3)-N(2)-C(2)    | 112.3(3)   | C(14)-C(15)-C(16) | 118.2(3) |
| C(19)-N(9)-C(23)  | 116.8(3)   | C(23)-C(22)-C(21) | 119.5(3) |
| C(19)-N(9)-Co(1)A | 119.24(19) | C(33)-C(32)-C(31) | 118.2(3) |
| C(23)-N(9)-Co(1)A | 122.9(2)   | N(11)-C(28)-C(27) | 123.1(3) |
| C(29)-N(12)-C(33) | 117.4(3)   | C(7)-C(6)-C(5)    | 119.2(3) |
| C(29)-N(12)-Co(1) | 122.64(19) | C(20)-C(21)-C(22) | 118.6(3) |
| C(33)-N(12)-Co(1) | 119.1(2)   | N(6)-C(13)-C(12)  | 123.4(3) |
| C(2)-N(1)-C(1)    | 113.5(3)   | C(11)-C(10)-C(9)  | 118.0(3) |
| C(3)-N(3)-C(1)    | 113.6(2)   | C(10)-C(11)-C(12) | 119.4(3) |
| C(2)-N(7)-C(19)   | 121.3(2)   | C(28)-C(27)-C(26) | 118.4(3) |
| C(2)-N(7)-C(14)   | 120.4(2)   | C(18)-C(17)-C(16) | 118.6(3) |
| C(19)-N(7)-C(14)  | 117.3(2)   | C(8)-C(7)-C(6)    | 118.3(3) |
| C(1)-N(4)-C(9)    | 123.0(2)   | C(30)-C(31)-C(32) | 119.4(3) |
| C(1)-N(4)-C(4)    | 117.0(2)   | C(25)-C(26)-C(27) | 119.5(3) |
| C(9)-N(4)-C(4)    | 119.6(2)   | C(13)-C(12)-C(11) | 118.4(3) |
| C(9)-N(6)-C(13)   | 117.4(3)   | N(5)-C(8)-C(7)    | 123.7(3) |

**Table S3.** The fit parameters obtained from analyses of the ac susceptibilities of **1** under 0.8 kOe bias dc field.

| $T / \text{K}$ | $\chi_T / \text{cm}^3 \text{mol}^{-1}$ | $\chi_S / \text{cm}^3 \text{mol}^{-1}$ | $\ln(\tau / \text{s})$ | $a$      | $R^2$    |
|----------------|----------------------------------------|----------------------------------------|------------------------|----------|----------|
| 1.8            | 1.84E+00                               | 2.01E-01                               | -9.28893               | 9.45E-02 | 4.60E-03 |
| 1.9            | 1.76E+00                               | 1.81E-01                               | -9.4279                | 1.06E-01 | 5.20E-04 |
| 2              | 1.67E+00                               | 1.76E-01                               | -9.56709               | 1.01E-01 | 6.01E-04 |
| 2.1            | 1.59E+00                               | 1.71E-01                               | -9.69883               | 9.49E-02 | 1.03E-03 |
| 2.2            | 1.53E+00                               | 1.64E-01                               | -9.80241               | 1.01E-01 | 6.43E-04 |
| 2.4            | 1.41E+00                               | 1.57E-01                               | -10.0145               | 9.50E-02 | 5.88E-04 |
| 2.6            | 1.31E+00                               | 1.59E-01                               | -10.1894               | 8.74E-02 | 4.67E-04 |
| 2.8            | 1.22E+00                               | 1.64E-01                               | -10.3429               | 7.80E-02 | 5.02E-04 |
| 3              | 1.14E+00                               | 1.51E-01                               | -10.5037               | 7.79E-02 | 5.00E-04 |
| 3.2            | 1.07E+00                               | 1.55E-01                               | -10.6254               | 7.25E-02 | 3.44E-04 |
| 3.4            | 1.01E+00                               | 1.55E-01                               | -10.7591               | 6.52E-02 | 2.86E-04 |
| 3.6            | 9.57E-01                               | 1.55E-01                               | -10.8688               | 6.25E-02 | 1.57E-04 |
| 3.8            | 9.10E-01                               | 1.37E-01                               | -10.9587               | 7.05E-02 | 1.23E-04 |
| 4              | 8.64E-01                               | 1.55E-01                               | -11.0457               | 5.04E-02 | 1.34E-04 |
| 4.2            | 8.24E-01                               | 1.46E-01                               | -11.1355               | 5.29E-02 | 1.40E-04 |

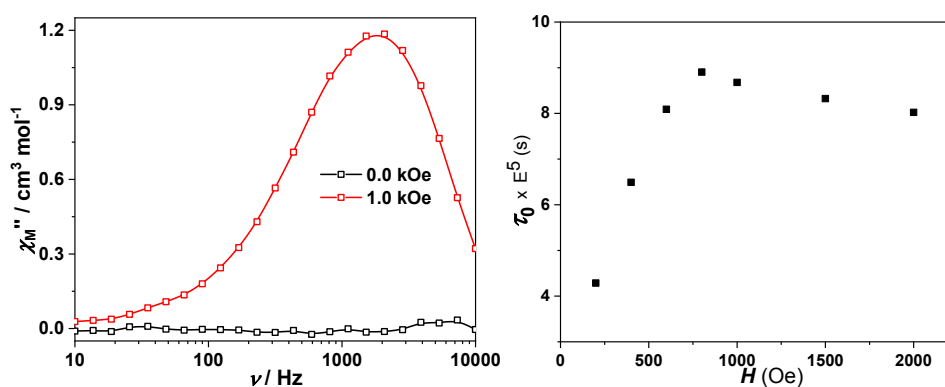

**Figure S1.** Left: Isothermal field sweep measurement performed on polycrystalline sample of complex **1**. Right: The plots  $\tau_0$  vs.  $H$  for complex **1**.

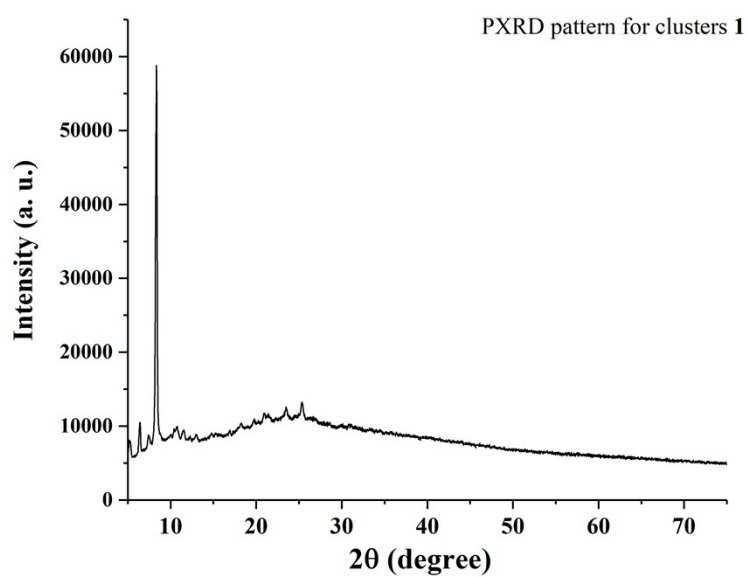

**Figure S2.** PXRD pattern for cluster **1**.

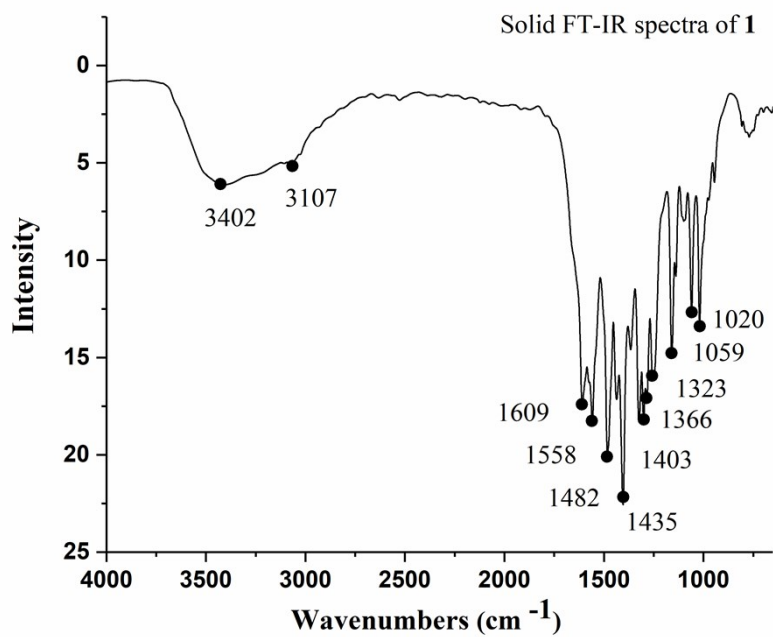

**Figure S3.** ATR-FTIR spectra of cluster **1**.
